# Supplementary material for: Structural and biochemical characteristics of two Staphylococcus epidermidis RNase J paralogs RNase J1 and RNase J2
Source: PubMed Central journal article supplement (PMC7864078; doi:10.1074/jbc.ra120.014876), 2021-01-13
Supplement: mmc1.pdf [file mmc1.pdf]

## Supplementary Material

### Tables

**Table S1.** Comparison of the active site cavity in characterized RNase J enzymes.

| PDB ID      | Organism                          | Protein  | Ligand                                        | Res (Å) | Cavity Volume (Å <sup>3</sup> ) |
|-------------|-----------------------------------|----------|-----------------------------------------------|---------|---------------------------------|
| 3ZQ4<br>(3) | <i>Bacillus subtilis</i>          | RNase J1 | Zn <sup>2+</sup> , Ca <sup>2+</sup>           | 3.0     | 2649.2                          |
| 5A0T<br>(4) | <i>Streptomyces coelicolor</i>    | RNase J  | PEG, Zn <sup>2+</sup>                         | 2.28    | 2326.9                          |
| 3T3N<br>(5) | <i>Thermus thermophilus</i>       | RNase J  | RNA, Zn <sup>2+</sup>                         | 3.09    | 1826.4                          |
| 3T3O<br>(5) |                                   | RNase J  | RNA, Gly, Zn <sup>2+</sup>                    | 2.5     | 1944.8                          |
| 3BK1<br>(6) |                                   | RNase J  | SO <sub>4</sub> , Gly, Zn <sup>2+</sup>       | 2.33    | 1446.2                          |
| 3BK2<br>(6) |                                   | RNase J  | UMP, SO <sub>4</sub> , Gly, Zn <sup>2+</sup>  | 2.1     | 1393.4                          |
| 4XWT<br>(7) | <i>Deinococcus radiodurans</i>    | RNase J  | UMP, Gly, Zn <sup>2+</sup> , Mn <sup>2+</sup> | 2.0     | 1934.4                          |
| 4XWW<br>(7) |                                   | RNase J  | RNA, Gly, Zn <sup>2+</sup> , Mn <sup>2+</sup> | 1.7     | 2013.0                          |
| 5HAA<br>(8) | <i>Methanobus psychrophilus</i>   | RNase J  | SO <sub>4</sub> , Zn <sup>2+</sup>            | 2.9     | 2148.8                          |
| 5HAB<br>(8) |                                   | RNase J  | SO <sub>4</sub> (RNA)                         | 2.3     | 2452.6                          |
|             | <i>Staphylococcus epidermidis</i> | RNase J2 | Mn <sup>2+</sup>                              | 2.7     | 2096.0                          |
|             |                                   | RNase J1 | Mn <sup>2+</sup>                              | 3.2     | 3108.6                          |

**Table S2.** List of expression constructs

|   | Tag                | Construct  | Vector          | Primers (5' to 3')                                                                                                                    |
|---|--------------------|------------|-----------------|---------------------------------------------------------------------------------------------------------------------------------------|
| 1 | C-His <sub>6</sub> | <i>rnl</i> | pET 22b         | Fw Pr:<br>ATATATGCTAGCATGAAACAACACTACATT<br>CAAATGAAGTAGGT GTATA<br>Rv Pr:<br>ATATATCTCGAGTTACTTATCTTCATTTA<br>CTTTCATTATCACAGGTA AAA |
| 2 | N-His <sub>6</sub> | <i>rnl</i> | pET Duet-1/MCSI | Fw Pr:<br>ATATATGGATCCGATGAAACAACACTACAT<br>TCAAATGAAGTAGGTGTATA<br>Rv Pr:                                                            |

|   |                    |                 |                        |                                                                                                                                |
|---|--------------------|-----------------|------------------------|--------------------------------------------------------------------------------------------------------------------------------|
|   |                    |                 |                        | ATATATAAGCTTTTAAATATCACCTATA<br>CCTACTGCCATCAAC                                                                                |
| 3 | N-His <sub>6</sub> | <i>rnj1ΔCTD</i> | pET<br>Duet-<br>1/MCSI | Fw Pr:<br>ATATATGGATCCGATGAAACAACACTACAT<br>TCAAATGAAGTAGGTGTATA<br>Rv Pr:<br>ATATATAAGCTTTTAAATATCACCTATA<br>CCTACTGCCATCAAC  |
| 4 | N-His <sub>6</sub> | <i>rnj2</i>     | pET<br>Duet-<br>1/MCSI | Fw Pr:<br>ATATATGGATCCGATGAGTTTAATAAAG<br>AAAAAAAATAAAGATATTCGTATT<br>Rv Pr:<br>ATATATAAGCTTTTAGATCTCCGATATG<br>ACTGGAATAATCAT |
| 5 | None               | <i>rnj1</i>     | pET<br>Duet-<br>1/MCS2 | Fw Pr:<br>GGCCAATTGATGAAACAACACTACATTCAA<br>ATG<br>Rv Pr:<br>GCCTCGAGTTACTTATCTTCATTTACTTT<br>CATTATCAC                        |

**Table S3.** Primers for site directed mutagenesis

| Mutant                | Vector                     | Primers (5' to 3')                                                                                                    |
|-----------------------|----------------------------|-----------------------------------------------------------------------------------------------------------------------|
| RNase J1<br>D78A      | pET<br>Duet-<br>1/MCS<br>I | Fw Pr: ATTACTCATGGACACGAAGCCCATATAGGTGGTGTG<br>Rv Pr: CACACCACCTATATGGGC TTCGTGTCCATGAGTAAT                           |
| RNase J1<br>H79A      | pET<br>Duet-<br>1/MCS<br>I | Fw Pr: ATTACTCATGGACACGAA GAC GCT<br>ATAGGTGGTGTGCCCTTC<br>Rv Pr: GAAGGGCACACCACCTAT AGC GTC<br>TTCGTGTCCATGAGTAAT    |
| RNase J1<br>D78A H79A | pET<br>Duet-<br>1/MCS<br>I | Fw Pr:<br>ATTACTCATGGACACGAAGCCGCTATAGGTGGTGTGCCCT<br>TC<br>Rv Pr:<br>GAAGGGCACACCACCTATAGCGGCTTTCGTGTCCATGAGTA<br>AT |
| RNase J1<br>H364A     | pET<br>Duet-<br>1/MCS<br>I | Fw Pr AGTAAAATTTCAAACATTGCCACTTCTGGACACGGT<br>Rv Pr: ACCGTGTCCAGAAGT GGC<br>AATGTTTCAAATTTTACT                        |
| RNase J1<br>S366A     | pET<br>Duet-<br>1/MCS<br>I | Fw Pr: AACATTCACACT GCT GGACACGGTTCTCAA<br>Rv Pr: TTGAGAACCGTGTCC AGC AGTGTGAATGTT                                    |
| RNase J1<br>H368A     | pET<br>Duet-<br>1/MCS      | Fw Pr ATTCACACTTCTGGA GCC GGTTCTCAAGGTGAT<br>Rv Pr: ATCACCTTGAGAACC GGC TCCAGAAGTGTGAAT                               |

|                            |                            |                                                                   |
|----------------------------|----------------------------|-------------------------------------------------------------------|
|                            | I                          |                                                                   |
| RNase J2<br>H80A           | pET<br>Duet-<br>1/MCS<br>I | Fw Pr: ACACACGGTCATGAA <u>GCT</u> GCTATAGGCGCAGTA                 |
|                            |                            | Rv Pr: TACTGCGCCTATAGC AGC TTCATGACCGTGTGT                        |
| RNase J2<br>E166A          | pET<br>Duet-<br>1/MCS<br>I | Fw Pr: GGTTCTATAGTTTATACTGGA GCG TTTAAGTTTGATCAA                  |
|                            |                            | Rv Pr: TTGATCAAACCTAAA CGC TCCAGTATAAACTATAGAACC                  |
| RNase J2<br>H80A E166<br>A | pET<br>Duet-<br>1/MCS<br>I | The H80A background was used to make H80A and E166A double mutant |
| RNase J2<br>S368A          | pET<br>Duet-<br>1/MCS<br>I | Fw Pr: AAGAAAATTCATGCGGCAAGTCATGGTTGTATGGAAGAA                    |
|                            |                            | Rv Pr: TTCTCCATACAACC ATG ACT TGC CGCATGAATTTTCTT                 |
| RNase J2<br>S369A          | pET<br>Duet-<br>1/MCS<br>I | Fw Pr: AAGAAAATTCATGCG TCA GCT CAT GGTTGTATGGAAGAA                |
|                            |                            | Rv Pr: TTCTCCATACAACC ATG AGC TGA CGCATGAATTTTCTT                 |
| RNase J2<br>H370A          | pET<br>Duet-<br>1/MCS<br>I | Fw Pr: AAGAAAATTCATGCG TCA AGT GCT GGTTGTATGGAAGAA                |
|                            |                            | Rv Pr: TTCTCCATACAACC AGC ACT TGA CGCATGAATTTTCTT                 |

**Table S4.** Primers for qRT-PCR

| S. N. | Organism                          | gene            | Primers (5' to 3')              |
|-------|-----------------------------------|-----------------|---------------------------------|
| 1     | <i>Staphylococcus epidermidis</i> | <i>rnj1</i>     | Fw Pr: GATATATCAAAGCGCCACCAG    |
|       |                                   |                 | Rv Pr: GATAATGCAGCCATA GGTTCCAC |
| 2     |                                   | <i>rnj2</i>     | Fw Pr: CATGCTATAGGCGCAGT        |
|       |                                   |                 | Rv Pr: GGGCCTTCATTGCTTCT        |
| 3     | <i>Staphylococcus aureus</i>      | <i>rnj1</i>     | Fw Pr: GCACCACCTGAAACATTTAT     |
|       |                                   |                 | Rv Pr: TACCTGGGATAGGTGATGAA     |
| 4     |                                   | <i>rnj2</i>     | Fw Pr: GCGCAACATAAGCATAAAAAT    |
|       |                                   |                 | Rv Pr: TTTAATTCTTCCATGCAACC     |
| 5     |                                   | <i>16s rRNA</i> | Fw Pr: TGTCGTGAGATGTTGGG        |
|       |                                   |                 | Rv Pr: CGATTCCAGCTTCATGT        |

## Figures

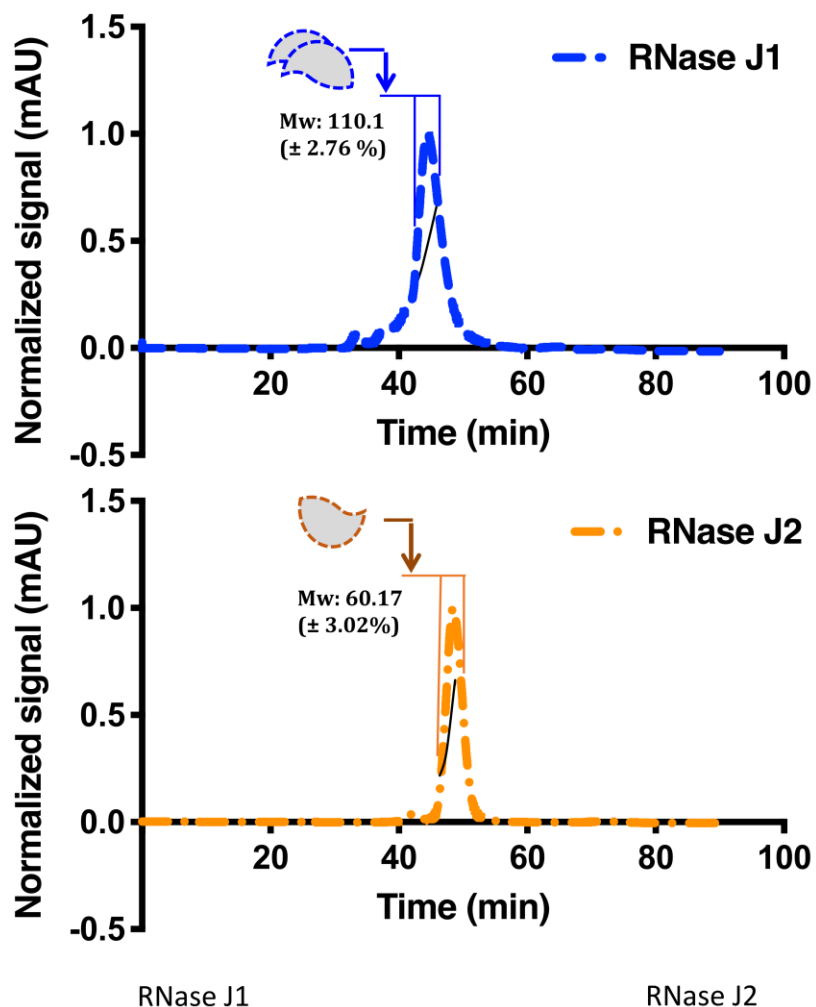

### Molar Mass Moments (G/mol)

|    |                                 |
|----|---------------------------------|
| Mn | 9.465X10 <sup>4</sup> (±1.959%) |
| Mp | 6.363X10 <sup>4</sup> (±1.107%) |
| Mv | n/a                             |
| Mw | 1.101X10 <sup>5</sup> (±2.769%) |
| Mz | 1.274X10 <sup>5</sup> (±6.919%) |

### Polydispersity

|       |                 |
|-------|-----------------|
| Mw/Mn | 1.163 (±3.392%) |
| Mz/Mn | 1.347 (±7.191%) |

### Molar Mass Moments (G/mol)

|    |                                 |
|----|---------------------------------|
| Mn | 5.319X10 <sup>4</sup> (±1.902%) |
| Mp | 4.073X10 <sup>4</sup> (±0.857%) |
| Mv | n/a                             |
| Mw | 6.017X10 <sup>4</sup> (±3.020%) |
| Mz | 6.869X10 <sup>4</sup> (±7.950%) |

### Polydispersity

|       |                 |
|-------|-----------------|
| Mw/Mn | 1.131 (±3.569%) |
| Mz/Mn | 1.296 (±8.175%) |

**Figure S1. Size exclusion Chromatography-Multi-Angle Light Scattering (SEC-MALS) of RNase J1 and RNase J2.**

Size exclusion chromatography (SEC) on freshly purified enzyme samples was performed using a Superdex 200 column (GE Healthcare). This experiment was performed on a miniDAWN instrument (Wyatt Technologies, Inc).

**Legends:  $M_n$  (Number average molecular weight):**  $M_n$  is the statistical average molecular weight of all the polymer chains in a sample.  $M_n = \frac{\sum N_i M_i}{\sum N_i}$  where  $M_i$  = Molecular weight of a subunit (polymer) and  $N_i$  = Number of chains of that subunit (polymer)

**$M_w$  (Weight average molecular weight):**  $M_w$  considers the molecular weight of a chain in determining contributions to the molecular weight average.  $M_w = \frac{\sum N_i M_i^2}{\sum N_i M_i}$

**$M_z$  (Z-average molecular weight):**  $M_z$  is measured in sedimentation equilibrium experiments. Z stands for centrifugation. It is also known as higher average molecular weight.

$$M_z = \frac{\sum N_i M_i^{n+1}}{\sum N_i M_i^n} \quad (\text{where } n=2)$$

**$M_p$  (Molecular weight of highest peak):**  $M_p$  is used for narrowly distributed (monodisperse) proteins such as standards used in calibration of a column.

**$M_v$  (Velocity average molar mass):** Used for gaseous states and invokes kinetic energy to determine molecular weight.

**Polydispersity index:** Used as a measure of broadness of a molecular weight distribution of a polymer (represented by  $M_w/M_n$ ). For a monodisperse polymer,  $M_w/M_n$  should be equal to 1.0.

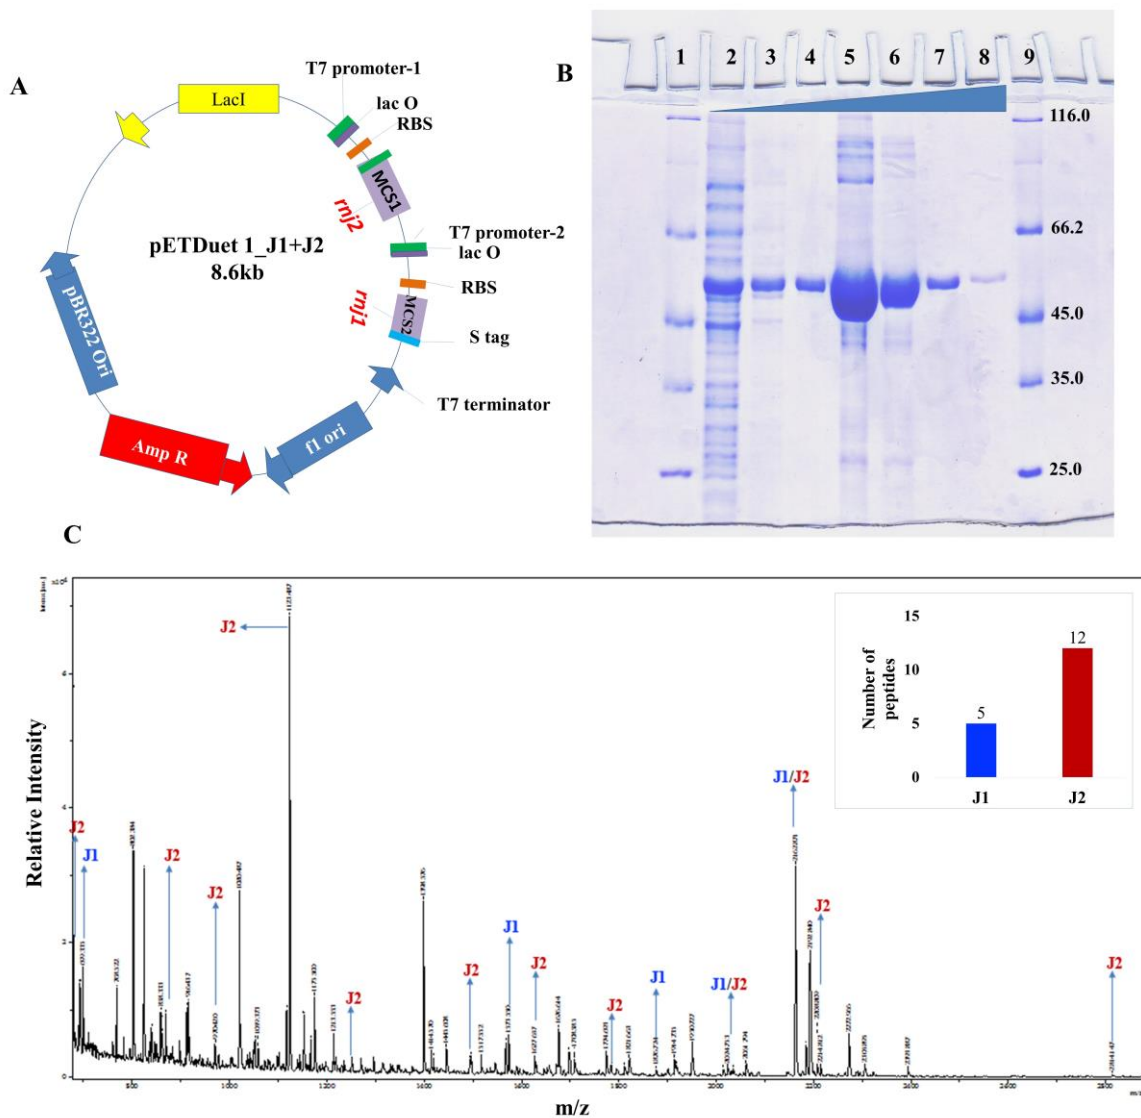

**MALDI-MS based peptide mapping of co-purified RNase J1 and RNase J2**

| Protein Name    | Fragment | m/z (Obs.) | MH <sup>+</sup> (Calc.) | Peptide sequence        |
|-----------------|----------|------------|-------------------------|-------------------------|
| <b>RNase J1</b> | 116-129  | 1573.5     | 1573.6                  | TAKLNEINEDSVIK          |
|                 | 252-257  | 693.3      | 693.3                   | IVTFGR                  |
|                 | 380-394  | 1876.7     | 1876.7                  | IIKPKYFLPIHGEYR         |
|                 | 490-505  | 2034.7     | 2034.8                  | GFVYMRESGQLIYDAQR       |
|                 | 490-507  | 2162.8     | 2162.9                  | GFVYMRESGQLIYDAQRKI     |
| <b>RNase J2</b> | 116-133  | 2034.8     | 2034.7                  | DKKVRYTYTVNDSIMRFK      |
|                 | 169-182  | 1627.6     | 1627.7                  | FDQSLHGHYAPDEK          |
|                 | 241-243  | 1496.7     | 1496.7                  | IQQVLNIASKLNR           |
|                 | 255-260  | 678.3      | 678.3                   | VSFLGR                  |
|                 | 255-270  | 1783.7     | 1783.7                  | VSFLGRSLESSFNAR         |
|                 | 261-270  | 1123.4     | 1123.5                  | SLESSFNAR               |
|                 | 261-271  | 1251.5     | 1251.6                  | SLESSFNARK              |
|                 | 272-279  | 970.4      | 970.4                   | MGYFDIPK                |
|                 | 437-456  | 2208.8     | 2208.8                  | VNSGNILIDGIGDVGNIY      |
|                 | 498-504  | 862.3      | 862.4                   | ESEDLLR                 |
|                 | 522-538  | 2162.8     | 2162.9                  | RIEWSEIKQNMVDQISK       |
|                 | 534-557  | 2814.1     | 2814.1                  | DQISKLLFESTKRPMIIPVISEI |

**Figure S2.** **A.** Schematic of the vector map of the construct co-expressing *rnj1* and *rnj2* in the pETDuet 1 vector (Novagen, Inc). **B.** The co-expressed proteins were co-purified by immobilized metal affinity chromatography. RNase J2 has a poly-histidine tag at the N-terminus. In this protein preparation, the lysis buffer contained 50mM Tris HCl (pH 8.0), 150mM NaCl, 2mM  $\beta$ -ME and 10% glycerol. The protein bound to the Ni-NTA affinity resin was eluted by a gradient of imidazole (5-250mM). Lane 1, 9 is the molecular weight marker; Lane 2: Flow through; Lanes 3, 4: protein in the wash fractions (two column volumes of the lysis buffer containing 5mM Imidazole); Lanes 5-8 protein fractions that were eluted with increasing concentration of imidazole. **C.** The eluted protein was digested with 20 $\mu$ g/ml trypsin (Sigma-Aldrich, Inc) and the fragments were analyzed by MALDI-TOF mass spectrometry (Bruker Daltonics, Inc). While fragments corresponding to both RNase J1 (blue) and RNase J2 (brown) could be identified, the lower concentration of RNase J1 in the eluted fraction precluded further use of this protein preparation for biophysical studies. The bar graph (inset) provides a graphic representation of the relative levels of the two paralogues in the co-purified protein preparation. The peptides that could be unambiguously mapped on to the sequence of *S. epidermidis* RNase J1 and RNase J2 are listed. The stoichiometric excess of RNase J2 in this sample suggests that RNase J2 can exist as a monomer on its own.

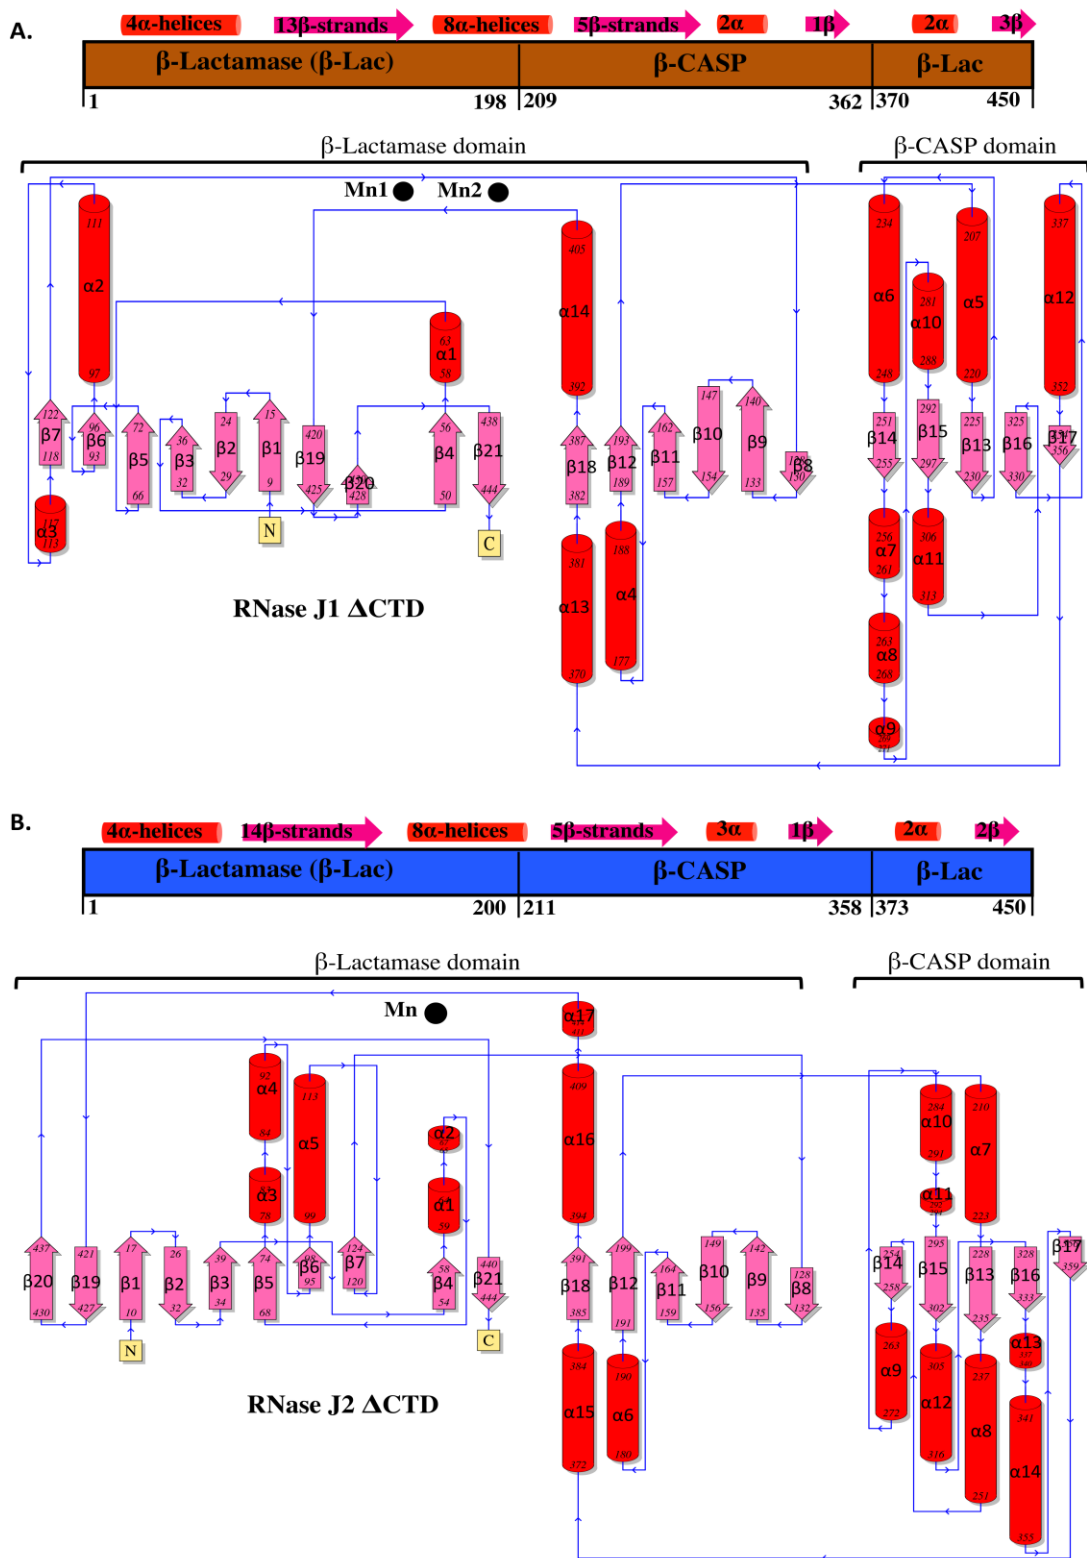

**Figure S3.** Domain architecture and topology of **A.** RNase J1 and **B.** RNase J2. The topology diagram was prepared using the PDBsum-web server (2).



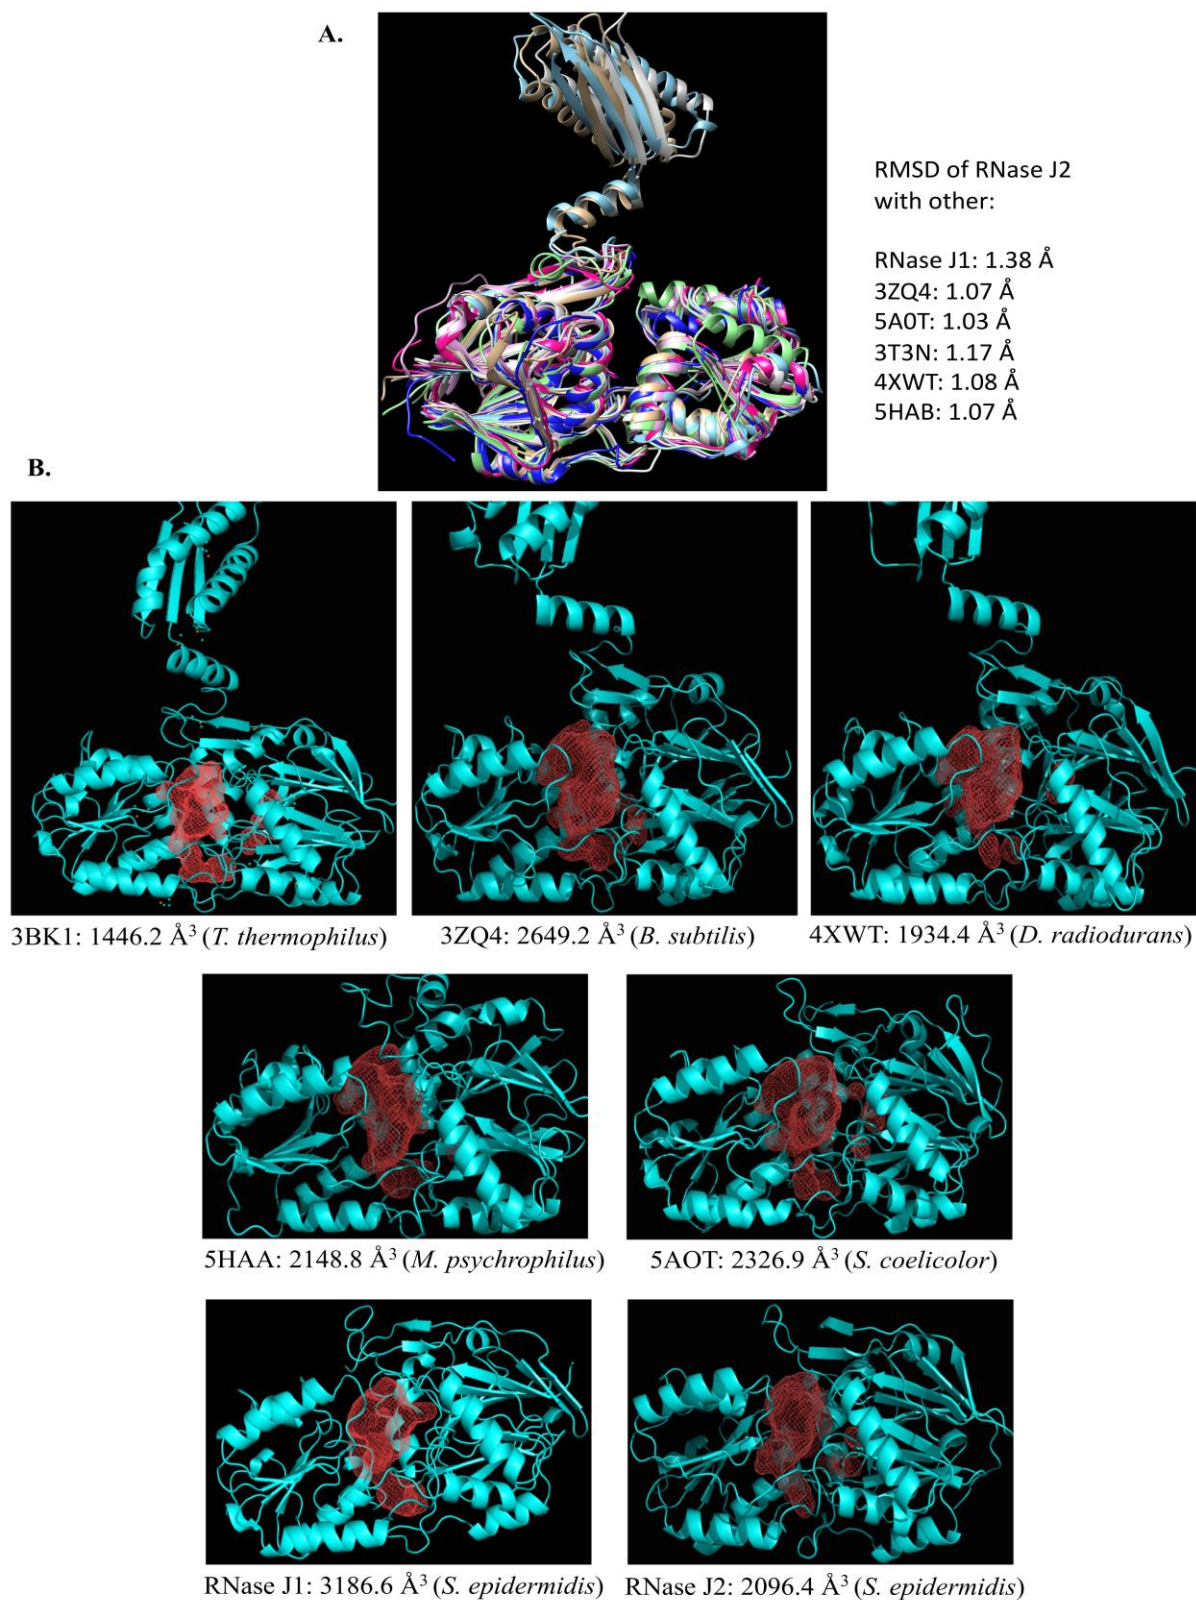

**Figure S4.** Representation of the active site pocket in RNase J1, RNase J2 and characterized RNase J homologues. **A.** Superposition of RNase J2 (blue) with RNase J1 (grey), 3ZQ4 (pink), 5A0T (green), 3T3N (brown), 4XWT (tan) and 5HAB (magenta). The C<sub>α</sub> average root mean square deviation is *ca* 1.1. **B.** The active site cavity (red mesh in each structure)



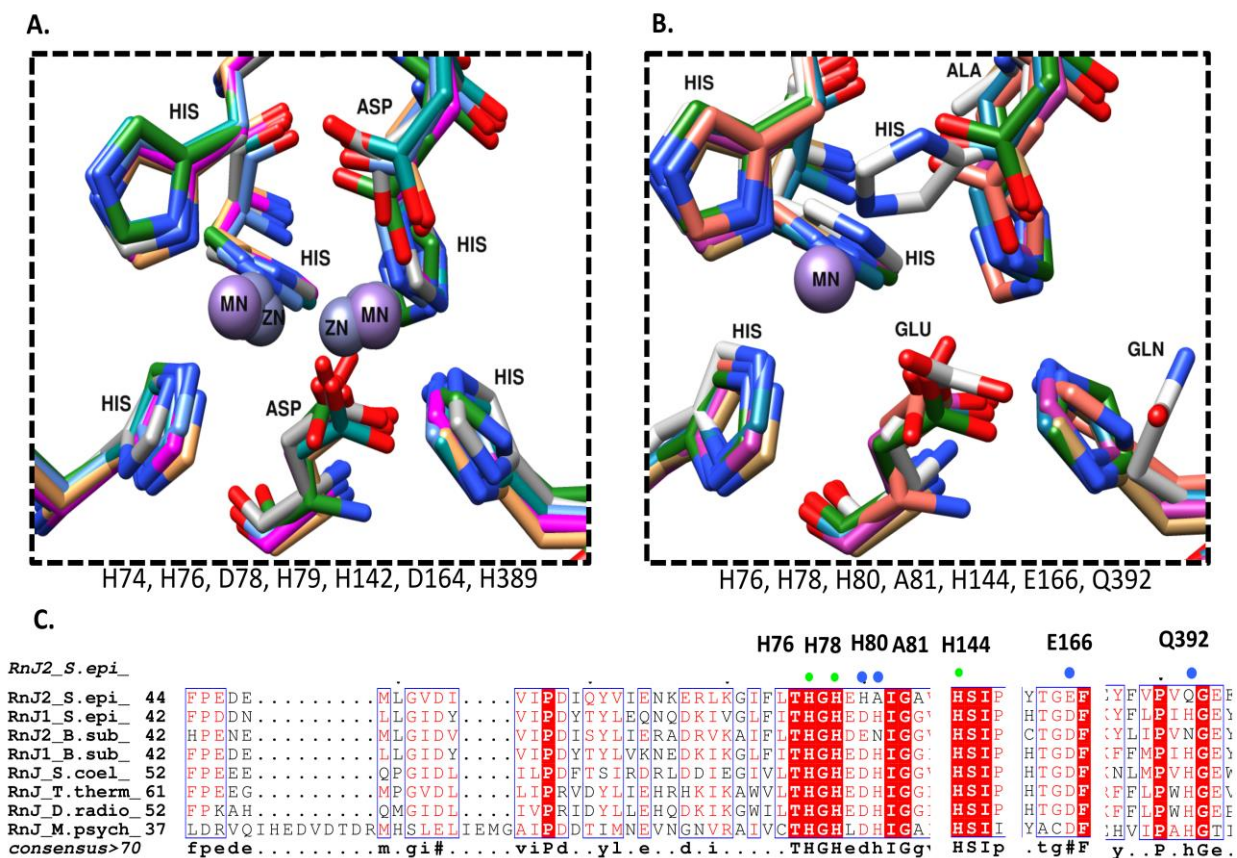

**Figure S6. A.** Superposition of active site of RNase J1 (grey) with five RNase J homologues. The relevant residues from RNase J1 are noted below the structural superposition. **B.** Superposition of active site of RNase J2 (grey) with five RNase J homologues. Residues at the active site of RNase J2 are noted. **C.** Sequence alignment of RNase J2 with RNase J1 and other homologs. In this alignment, green dots represent conserved residues while blue dots show substitutions in RNase J2. This sequence alignment was prepared using ESPript 3.0 (4) and the molecular representations were made using UCSF Chimera (5)

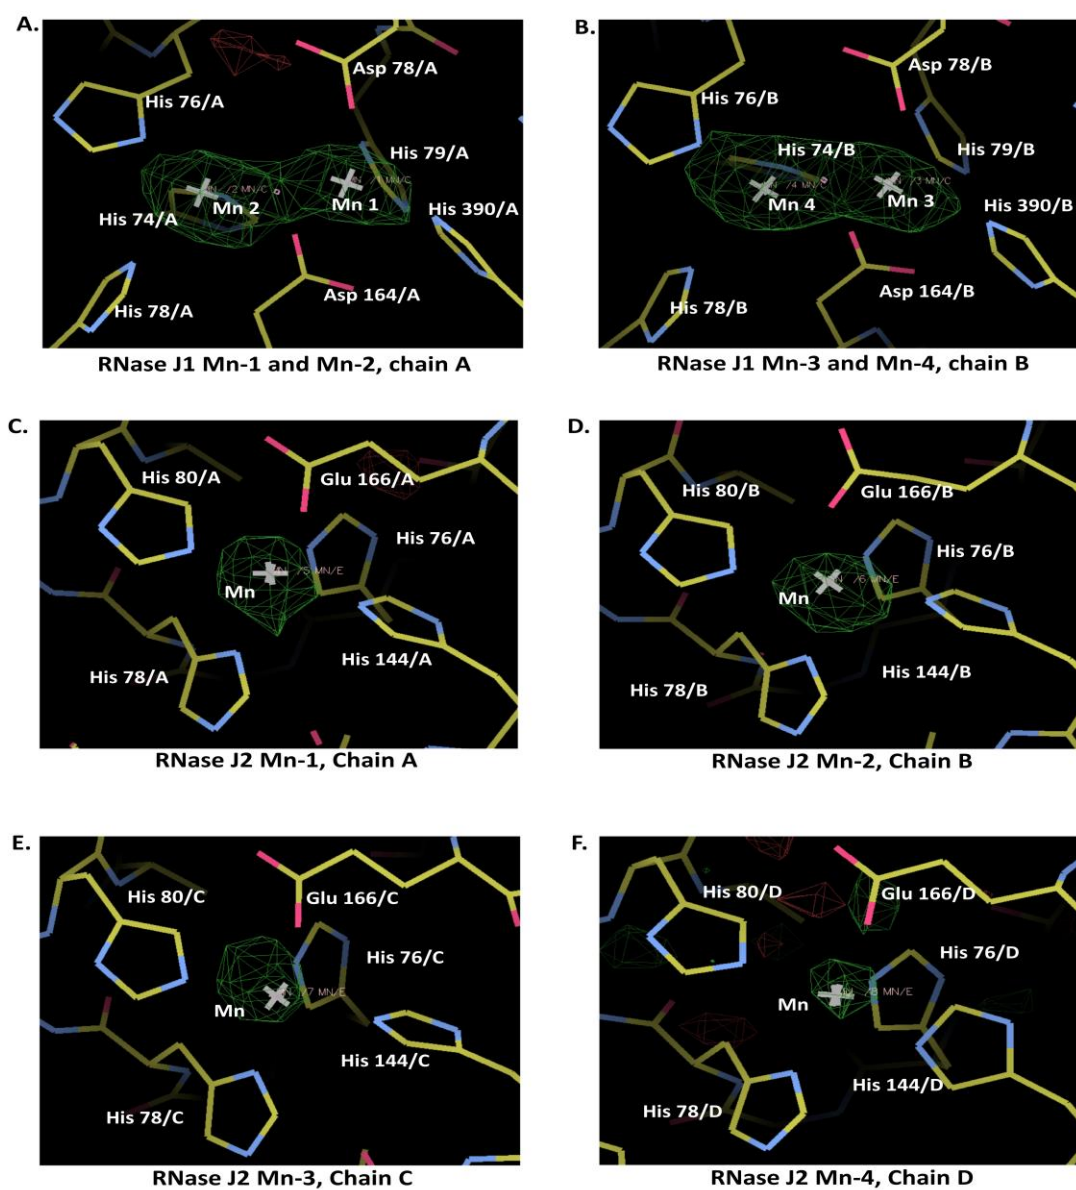

**Figure S7.** Anomalous difference Fourier electron density maps show the bound metal ion ( $\text{Mn}^{2+}$ ) at the active site of RNase J1 and RNase J2. A and B. In the case of RNase J1, the data was collected at a synchrotron source. C-F. The diffraction data for this crystal was collected at a home source (Rigaku FRE X-Ray generator and Raxis IV detector) at 1.54 Å. There are four molecules of RNase J2 in the asymmetric unit of the crystal. Snapshots of the electron density maps are shown for all four active sites.

27-mer DNA: 5'-TCTTTACGGTGCTATTTTGTTC-3'  
 27-mer RNA: 5'-UCUUUACGGUGCUAUUUUGUUUUGUUC-3'

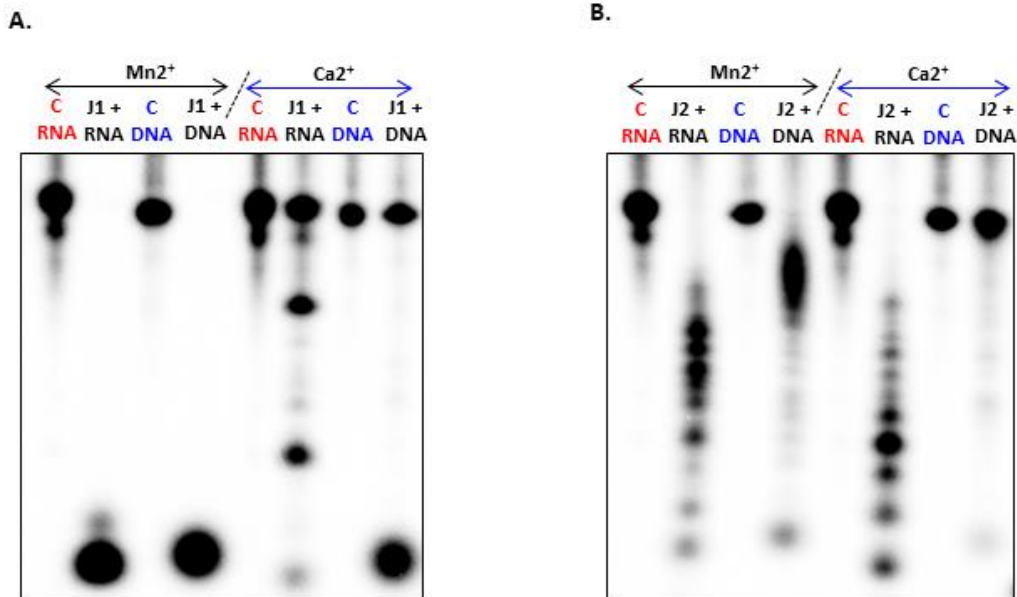

**Figure S8. The *Staphylococcal* RNase J paralogues show DNase activity**

A comparison between the DNase and RNase activity of RNase J1 and RNase J2. The sequences of 27-mer RNA and 27-mer DNA substrates is shown. The RNA substrate used in this experiment is identical to that used in the characterization of the *S. aureus* RNase J1 (1). **A.** Both RNase and DNase activity of RNase J1 prefer Mn<sup>2+</sup> as a metal co-factor. We note trace endo-nuclease activity on the RNA substrate and poor exonuclease activity on the DNA substrate in the presence of Ca<sup>2+</sup>. **B.** In the case of RNase J2, while the RNase activity is relatively higher in the presence of Ca<sup>2+</sup> (when compared to Mn<sup>2+</sup>), DNase activity is higher in the presence of Mn<sup>2+</sup>. As stated in the manuscript, RNase J2 is a less active enzyme when compared to RNase J1. The concentration of RNase J2 is thus higher in these assays (72μM) when compared to RNase J1 (600nM).

20-mer-RNA: 5'-ACUGGACAAAUACUCCGAGG-3'

A. C EDTA Mn Mg Ca Co Zn  $\gamma$ ATP

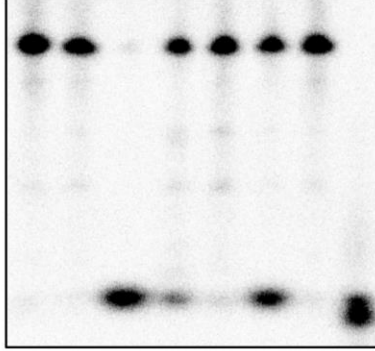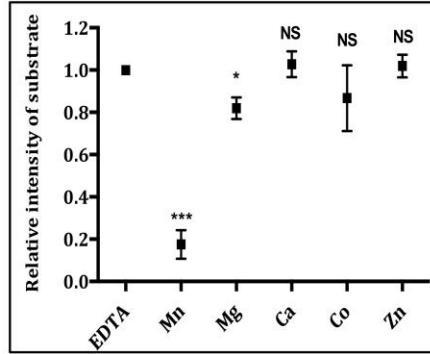

[2mM] EDTA - Mg Ca Co Zn  
[Mn] C + + + + +  $\gamma$ ATP

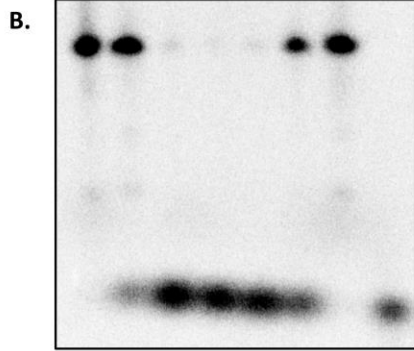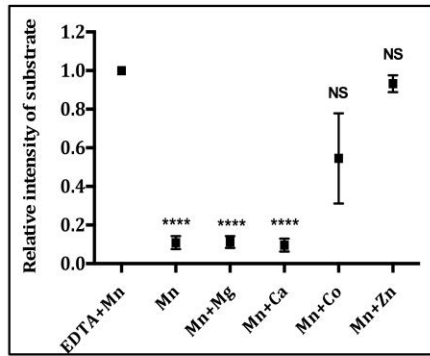

C. C EDTA Mn Mg Ca Co Zn  $\gamma$ ATP

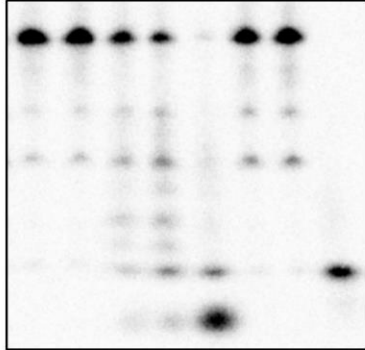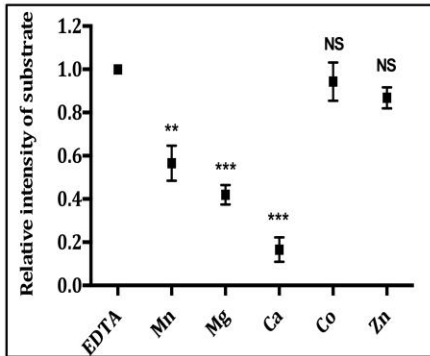

[2mM] EDTA - Mg Ca Co Zn  
[Mn] C + + + + +  $\gamma$ ATP

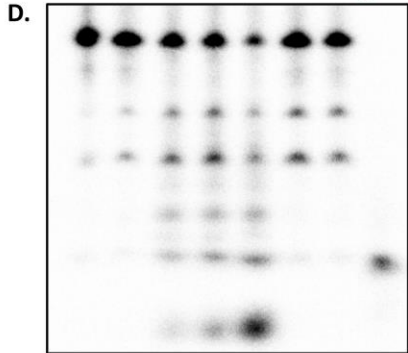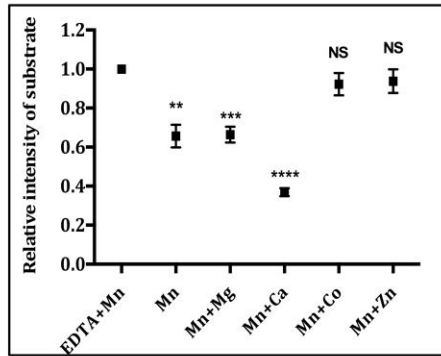

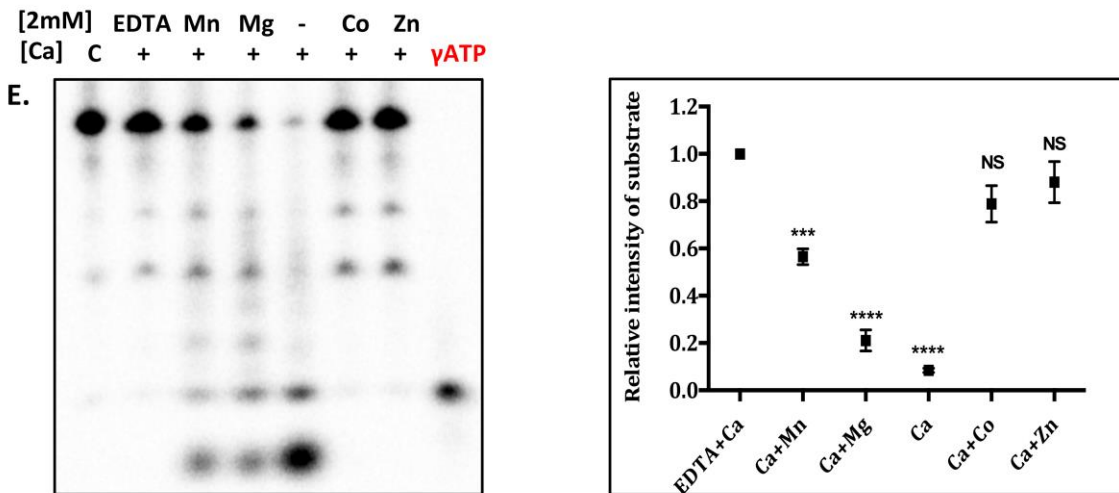

**Figure S9. Influence of metal cofactors on the RNase activity of RNase J1 and RNase J2.**

**A.** Activity of RNase J1 in the presence of different metal ions. The sequence of the 20-mer RNA substrate used in this assay is shown. The first lane is the control (no enzyme) while the second is the reaction mixture with a chelator (EDTA). The subsequent lanes show reactions performed in the presence of different metal ions. Decrease in substrate concentration was highest in the presence of  $Mn^{2+}$ . Statistics from an unpaired *t*-test are noted (shown as mean  $\pm$  s.e.m). These are- \**P* < 0.05, \*\**P* < 0.01, \*\*\**P* < 0.001, \*\*\*\**P* < 0.0001, NS: not significant. **B.** A control activity assay where  $Mn^{2+}$  is constant (1 mM; depicted by “+” on each lane) while the other metal ions are maintained at 2 mM concentration. The quantification of the data from the 20 % Urea PAGE is shown in the adjacent panel.  $Zn^{2+}$  inhibits catalytic activity of RNase J1. Unpaired *t*-test with different competing metal ions in presence of  $Mn^{2+}$ , data shown as mean  $\pm$  s.e.m. **C.** Activity assay of RNase J2 in the presence of different metal cofactors. The first lane is the control (without enzyme) while the second is with the chelator, EDTA. Subsequent lanes show reactions performed in the presence of different metal ions. **D.** A competition assay for comparison between different metal co-factors for RNase J2 activity. While addition of  $Ca^{2+}$ ,  $Mg^{2+}$  and  $Mn^{2+}$  showed significant decrease in the intensity of the band corresponding to the substrate,  $Co^{2+}$  and  $Zn^{2+}$  does not seem to influence catalytic activity. **E.** A control activity assay where  $Ca^{2+}$  is constant (1 mM; shown by the “+” sign on the top of each lane) while the other metal ions are maintained at 2 mM concentration. The data is shown as mean  $\pm$  s.e.m.

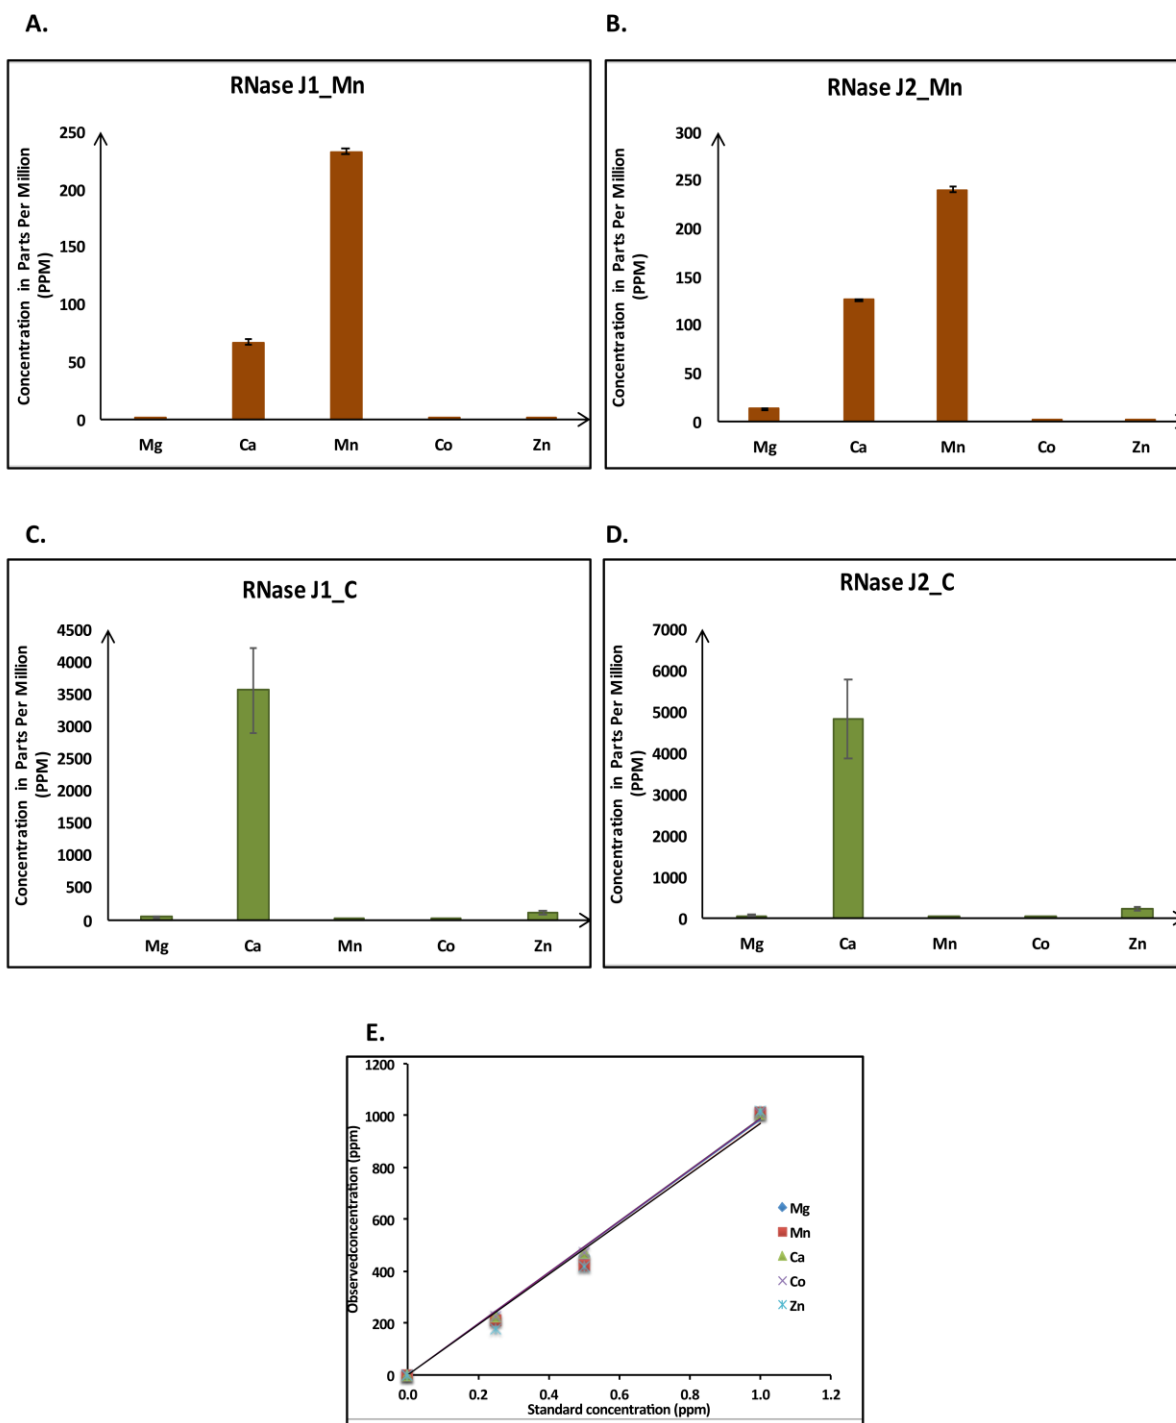

**Figure S10. Inductively coupled plasma mass spectrometry (ICP-MS) analysis of protein samples.** **A.** Freshly purified RNase J1 samples show the presence of bound  $Mn^{2+}$ ,  $Ca^{2+}$  and a trace  $Mg^{2+}$ ,  $Co^{2+}$  and  $Zn^{2+}$ . **B.** Freshly purified RNase J2 samples show the presence of bound  $Mn^{2+}$ ,  $Ca^{2+}$  and a trace  $Mg^{2+}$ ,  $Co^{2+}$  and  $Zn^{2+}$ . **C.** Replacement of metal ions for activity assays evaluated by ICP-MS. Chelation of  $Mn^{2+}$  and subsequent replacement by  $Ca^{2+}$  in the case of RNase J1 (**C**) and RNase J2 (**D**). This information was essential to evaluate enzyme samples used in activity assays and validate the experimental protocol for metal ion replacement prior to biochemical analysis.



| Strains    | Source            | SCC <i>mec</i> type | PVL | Agr | ST/CC     | Genome ID     | Reference(s)                   |
|------------|-------------------|---------------------|-----|-----|-----------|---------------|--------------------------------|
| LVP-2      | Corneal scrapping | V                   | +   | II  | 772 (CC1) | AOFV00000000  | PMID:22291460<br>PMID:24722327 |
| LVP-7      | Orbital abscess   | V                   | +   | III | 88 (CC88) | Not sequenced | PMID:22291460                  |
| GH-3989    | Pneumonitis       | V                   | +   | II  | 772 (CC1) | ALWH00000000  | PMID:22548694<br>PMID:24722327 |
| COL        | HA-MRSA           | I                   | -   | I   | 250 (CC8) | CP000046      | PMID:15774886                  |
| ATCC 12228 | ATCC strain       | SSC <i>pbp4</i>     | -   | I   | 2 (CC2)   | CP022247      | PMID:28883148                  |
| AEH-333    | Corneal ulcer     | V                   | +   | II  | 772(CC1)  | ALWF00000000  | PMID:22291460                  |
| VH-60      | Nasal carrier     | V                   | +   | II  | 772(CC1)  | ALWG00000000  | PMID:22548694<br>PMID:24722327 |
| LVP-1      | Corneal scrapping | MSSA                | -   | III | 1(CC1)    | Not sequenced | PMID:22291460                  |

\*SCC*mec*- Staphylococcal cassette chromosome *mec*, PVL-Paton-Valentine Leucocidin,

*Agr*- Accessory gene regulator.

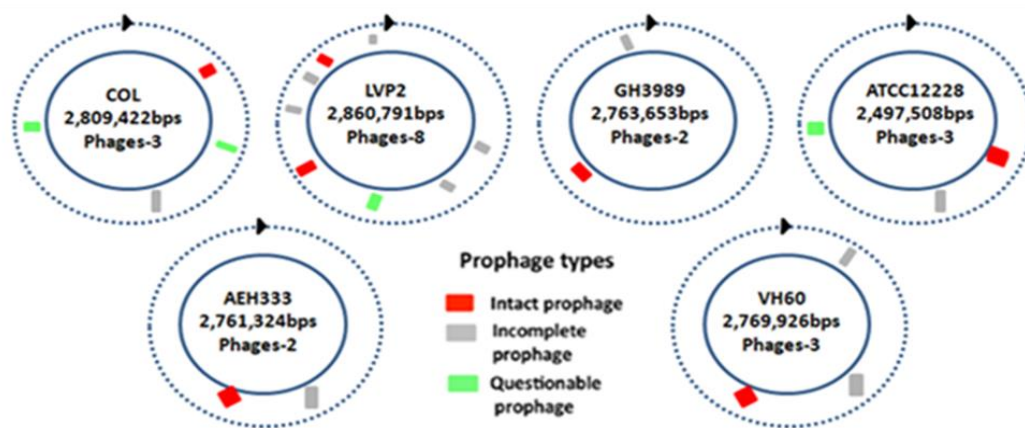

**Figure S11. Compilation of the clinical, genotypic and prophage signatures in the different *Staphylococcal* strains examined in this study.** The prophage signatures in the clinical isolates were predicted using the genome sequences (6,7,8). The phage search tool (PHAST) was used for this sequence search (9).

## References

1. Hausmann, S., Guimaraes, V.A., Garcin, D., Baumann, N., Linder, P. and Redder, P. (2017) Both exo- and endo-nucleolytic activities of RNase J1 from *Staphylococcus aureus* are manganese dependent and active on triphosphorylated 5'-ends. *RNA Biol*, **14**, 1431-1443.
2. Laskowski, R.A., Jablonska, J., Pravda, L., Varekova, R.S. and Thornton, J.M. (2018) PDBsum: Structural summaries of PDB entries. *Protein Sci*, **27**, 129-134.

3. Ho, B.K. and Gruswitz, F. (2008) HOLLOW: generating accurate representations of channel and interior surfaces in molecular structures. *BMC Struct Biol*, **8**, 49.
4. Robert, X. and Gouet, P. (2014) Deciphering key features in protein structures with the new ENDscript server. *Nucleic Acids Res*, **42**, W320-324.
5. Pettersen, E.F., Goddard, T.D., Huang, C.C., Couch, G.S., Greenblatt, D.M., Meng, E.C. and Ferrin, T.E. (2004) UCSF Chimera--a visualization system for exploratory research and analysis. *J Comput Chem*, **25**, 1605-1612.
6. Nadig, S., Velusamy, N., Lalitha, P., Kar, S., Sharma, S. and Arakere, G. (2012) *Staphylococcus aureus* eye infections in two Indian hospitals: emergence of ST772 as a major clone. *Clin Ophthalmol*, **6**, 165-173.
7. Balakuntla, J., Prabhakara, S. and Arakere, G. (2014) Novel rearrangements in the *staphylococcal* cassette chromosome mec type V elements of Indian ST772 and ST672 methicillin resistant *Staphylococcus aureus* strains. *PLoS One*, **9**, e94293.
8. Shambat, S., Nadig, S., Prabhakara, S., Bes, M., Etienne, J. and Arakere, G. (2012) Clonal complexes and virulence factors of *Staphylococcus aureus* from several cities in India. *BMC Microbiol*, **12**, 64.
9. Zhou, Y., Liang, Y., Lynch, K.H., Dennis, J.J. and Wishart, D.S. (2011) PHAST: a fast phage search tool. *Nucleic Acids Res*, **39**, W347-352.
